# Supplementary material for: Molecular recognition of naphthalene diimide ligands by telomeric quadruplex-DNA: the importance of the protonation state and mediated hydrogen bonds
Source: Royal Society of Chemistry journal article supplement (doi:10.1039/c5cp05576h), 2015-12-16
Supplement: c5cp05576h1.pdf [file c5cp05576h1.pdf]

# **Molecular Recognition of Naphthalene Diimide Ligands by Telomeric Quadruplex-DNA: The Importance of the Protonation State and Mediated Hydrogen Bonds**

A. Spinello,<sup>a,b</sup> G. Barone,<sup>\*a,b</sup> J. Grunenberg<sup>\*c</sup>

a) Università di Palermo, Dipartimento di Scienze e Tecnologie Biologiche, Chimiche e Farmaceutiche, Italy

b) Istituto Euro-Mediterraneo di Scienza e Tecnologia (IEMEST), Palermo, Italy

c) Technische Universität Braunschweig, Institut für Organische Chemie, Germany

## **Supporting Information**

The total energy values obtained from the conformational searches on the isolated ligands are reported in Table S1. The terminal protonation states are always the most stable isomers.

Table S1: Calculated MM total energy for the isolated ligands (implicit water model, global minimum conformation, in kJ/mol)

|              | <b>1</b> | <b>2</b> | <b>3</b> | <b>4</b> |
|--------------|----------|----------|----------|----------|
| <b>intra</b> | -136.48  | 0.72     | -45.33   | -15.86   |
| <b>ter</b>   | -264.27  | -103.91  | -181.14  | -149.43  |

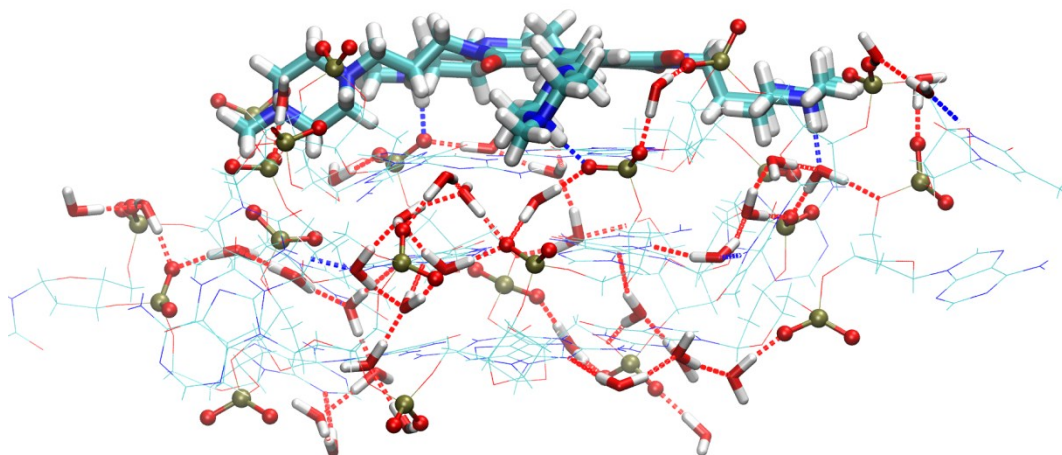

Figure S1: Network of hydrogen bonds mediated by water in ligand **2** complex.

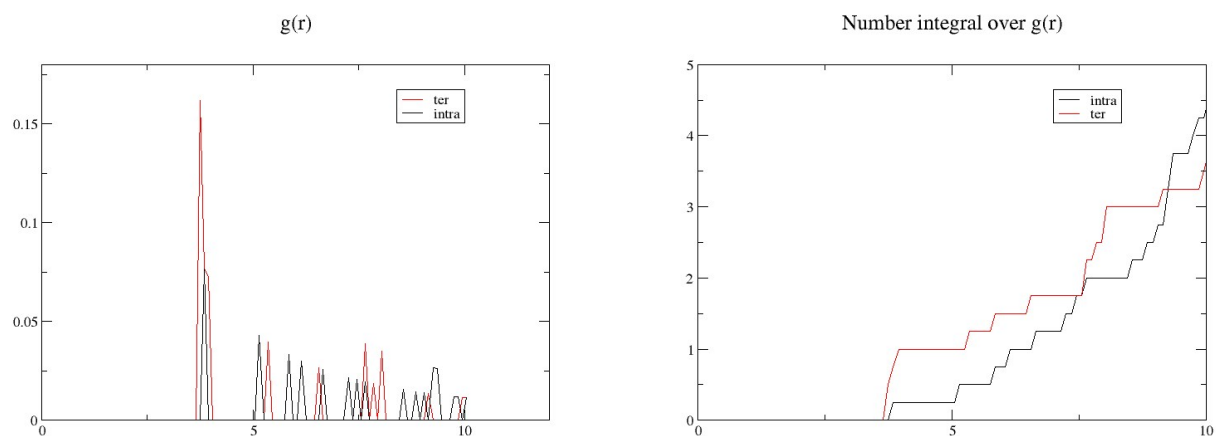

Figure S2: Radial distribution functions (left) and related integrals (right) of the charged nitrogens and phosphorous atoms for ligands ND **1**.
